# Supplementary material for: New Particle Formation and impact on CCN concentrationsin the boundary layer and free troposphere at the highaltitude station of Chacaltaya (5240 m a.s.l.), Bolivia
Source: Copernicus journal article supplement (doi:10.5194/acp-2016-696), 2016-08-15
Supplement: Supplementary file 1 [file acp-2016-696-supplement.pdf]

1 **Supplementary material – New particle formation and**  
2 **impact on CCN concentrations in the boundary layer and**  
3 **free troposphere at the high altitude station of Chacaltaya**  
4 **(5240 m a.s.l.), Bolivia**

5  
6 **1 Results**

7

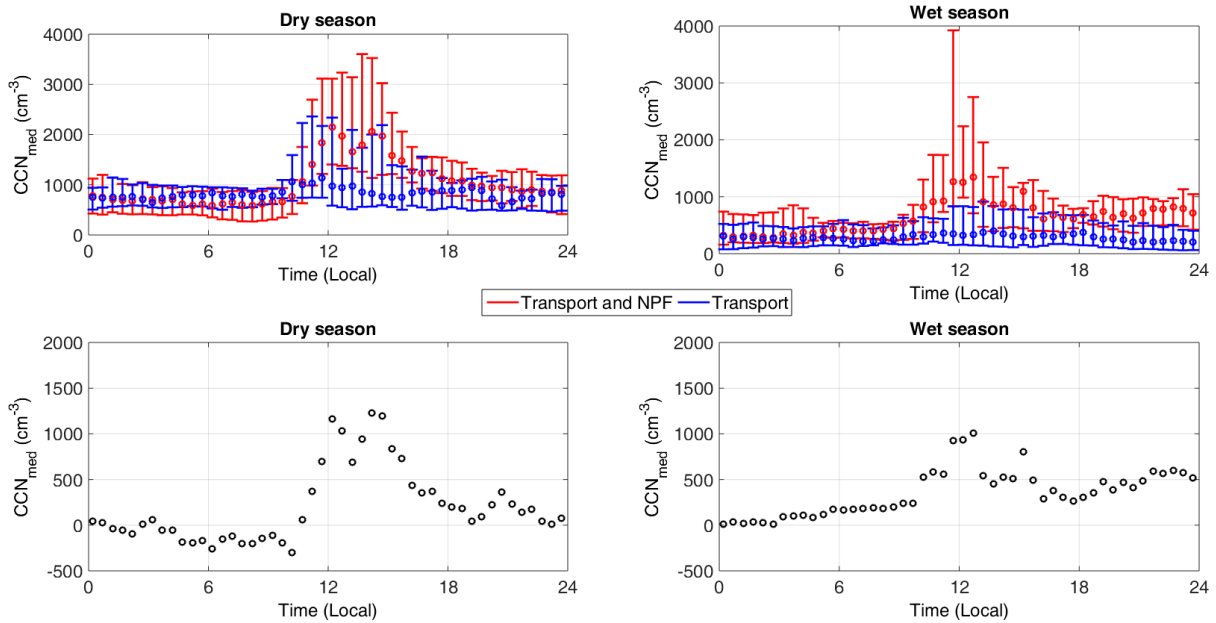

17 Fig. S1. Median diurnal variation of CCN<sub>med</sub> on event (upper panel, “Transport and NPF”)  
18 and non-event days (upper panel, “Transport”). CCN<sub>med</sub> attributed to NPF (lower panel)  
19 is calculated as the difference of the concentrations recorded on event and non-event days.  
20 Lower and upper limits of the error bars stand for the 1<sup>st</sup> and 3<sup>rd</sup> quartile, respectively.  
21 Chacaltaya, 2012.

22

23

24

25

26

1

2

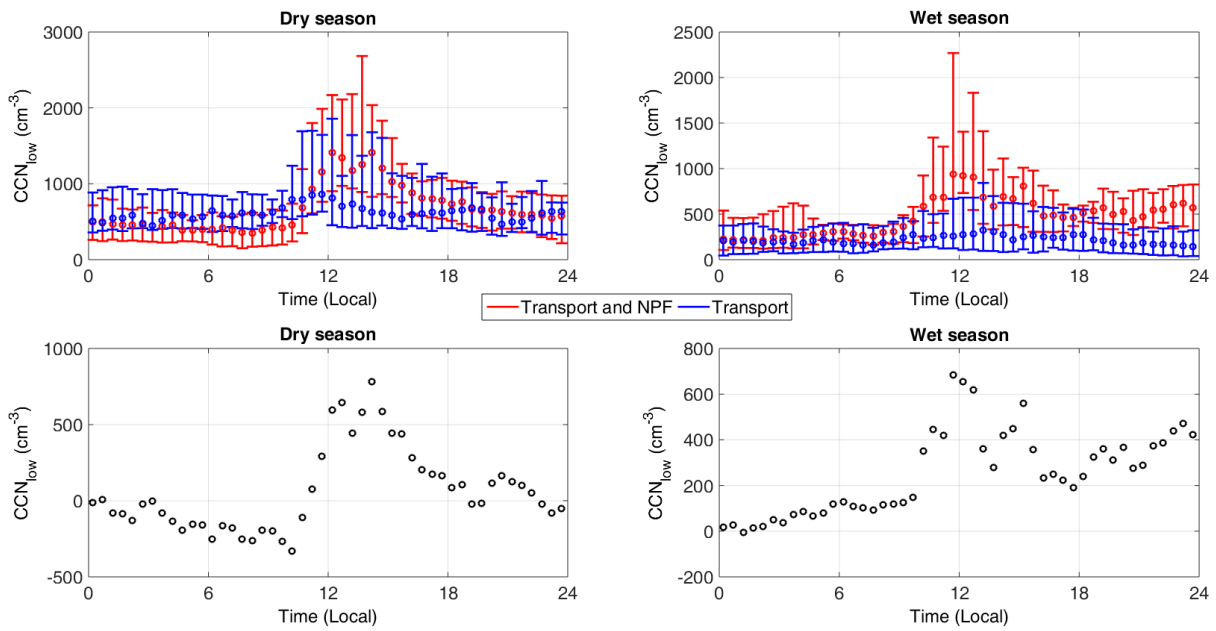

12 Fig. S2. Median diurnal variation of  $CCN_{low}$  on event (upper panel, “Transport and NPF”)  
13 and non-event days (upper panel, “Transport”).  $CCN_{low}$  attributed to NPF (lower panel) is  
14 calculated as the difference of the concentrations recorded on event and non-event days.  
15 Lower and upper limits of the error bars stand for the 1<sup>st</sup> and 3<sup>rd</sup> quartile, respectively.  
16 Chacaltaya, 2012.
